# Supplementary material for: Malaria elimination challenges in Mesoamerica: evidence of submicroscopic malaria reservoirs in Guatemala
Source: Springer Nature journal article supplement (doi:10.1186/s12936-016-1500-6), 2016-08-30

# ALTA VERAPAZ

20 0 20 40 60 80 m

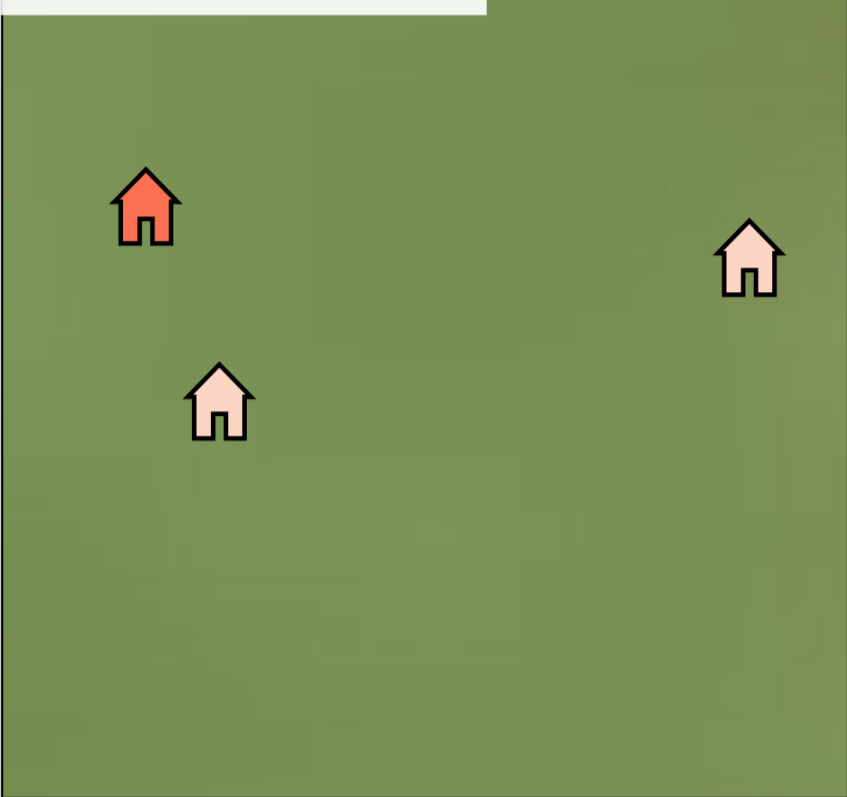

20 0 20 40 60 80 m

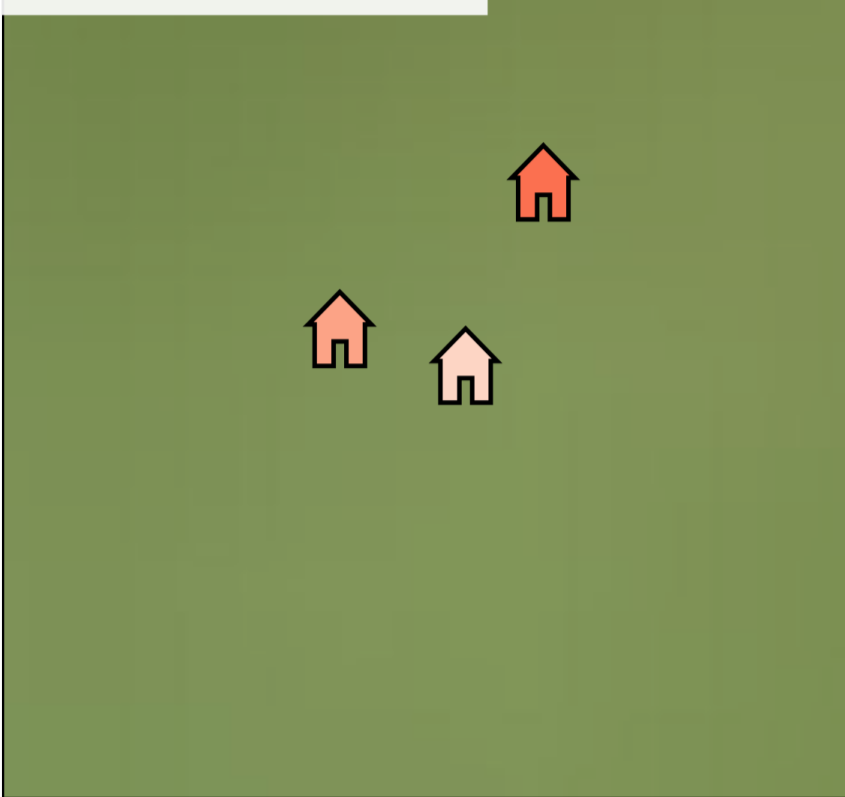

# GUATEMALA

25 0 25 50 75 100 km

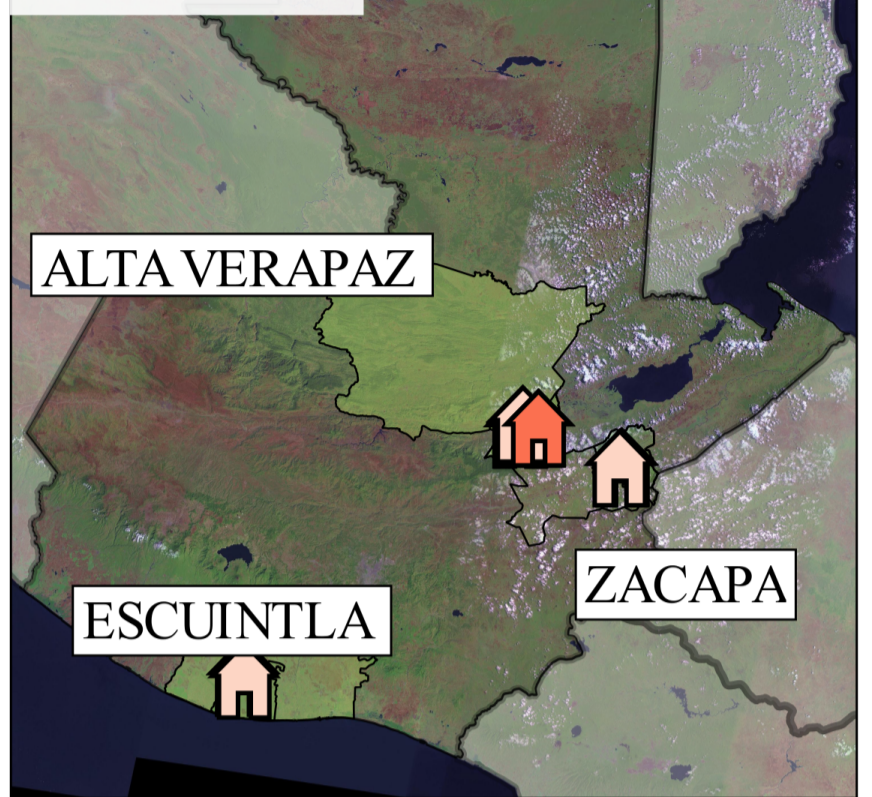

# ZACAPA

100 0 100 200 300 400 m

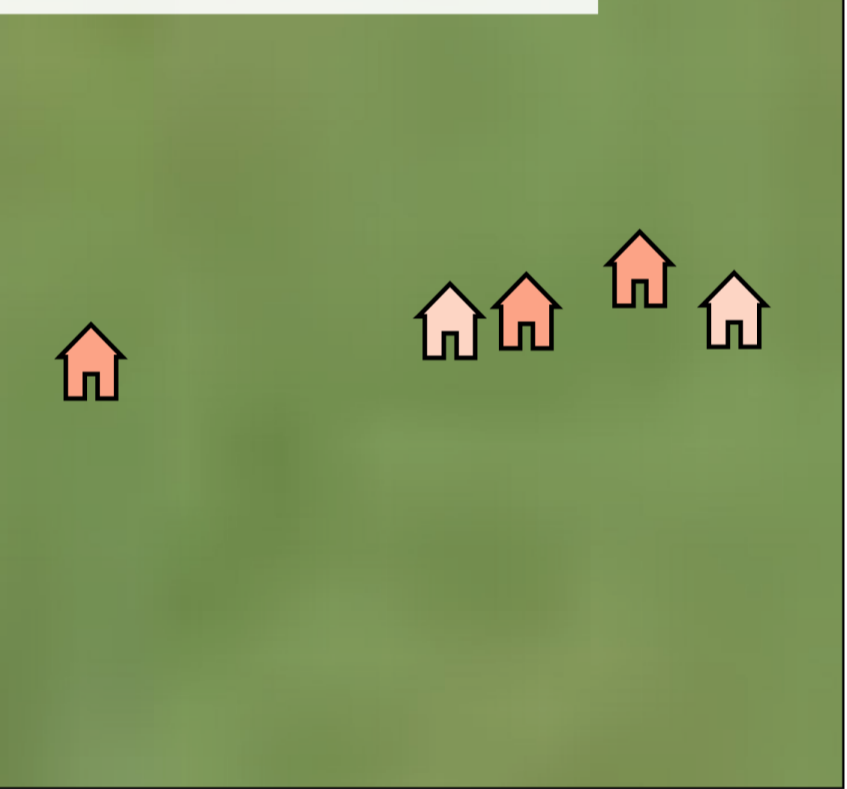

20 0 20 40 60 80 m

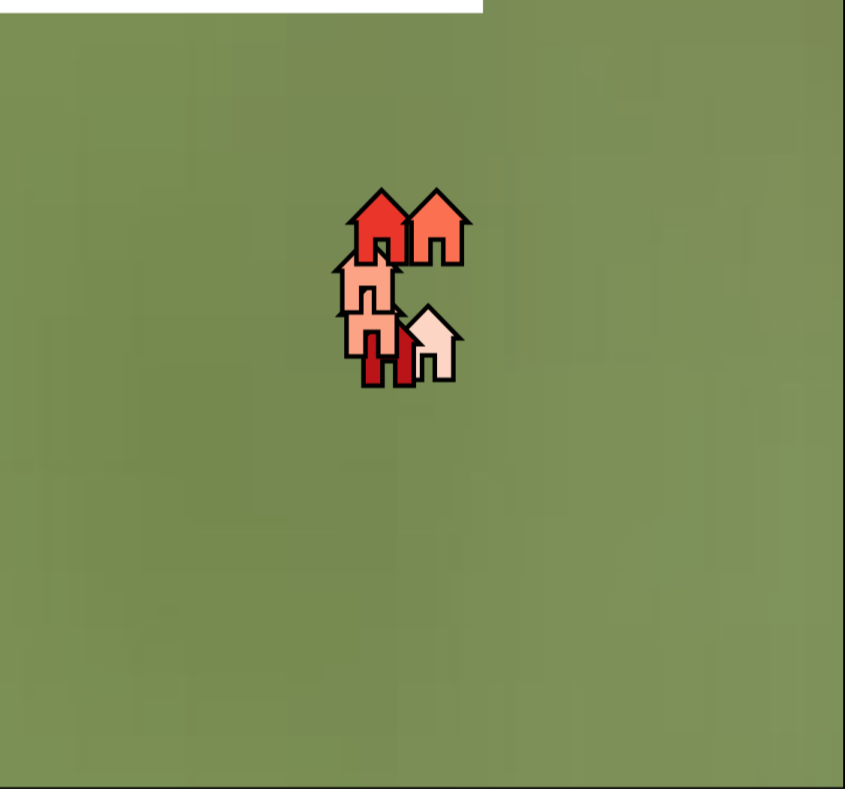

100 0 100 200 300 400 m

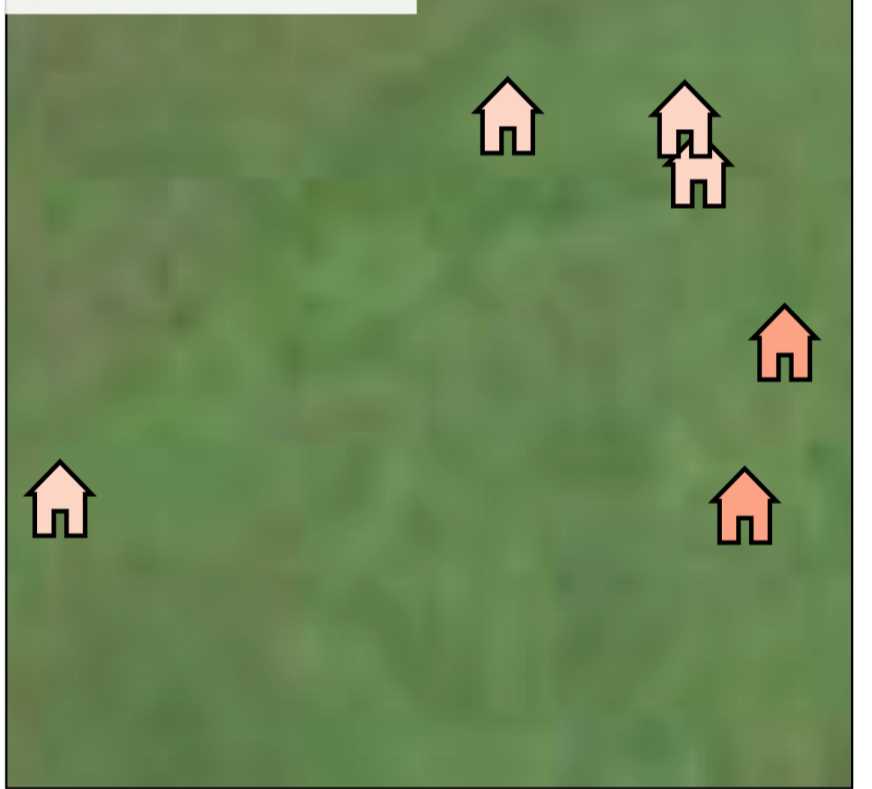

# ESCUINTLA

10 0 10 20 30 40 m

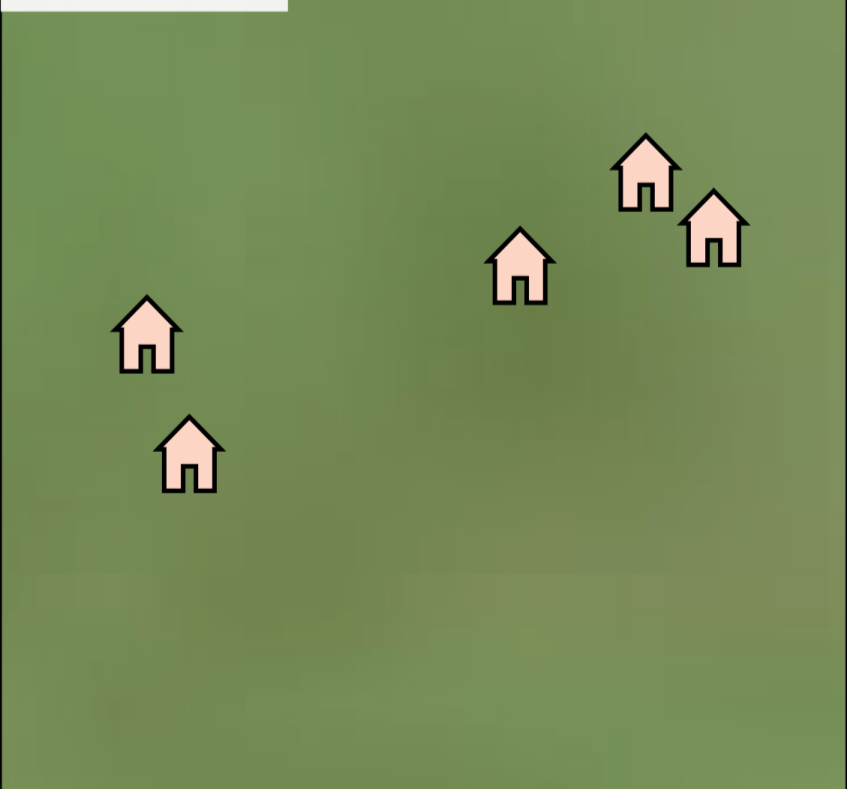

10 0 10 20 30 40 m

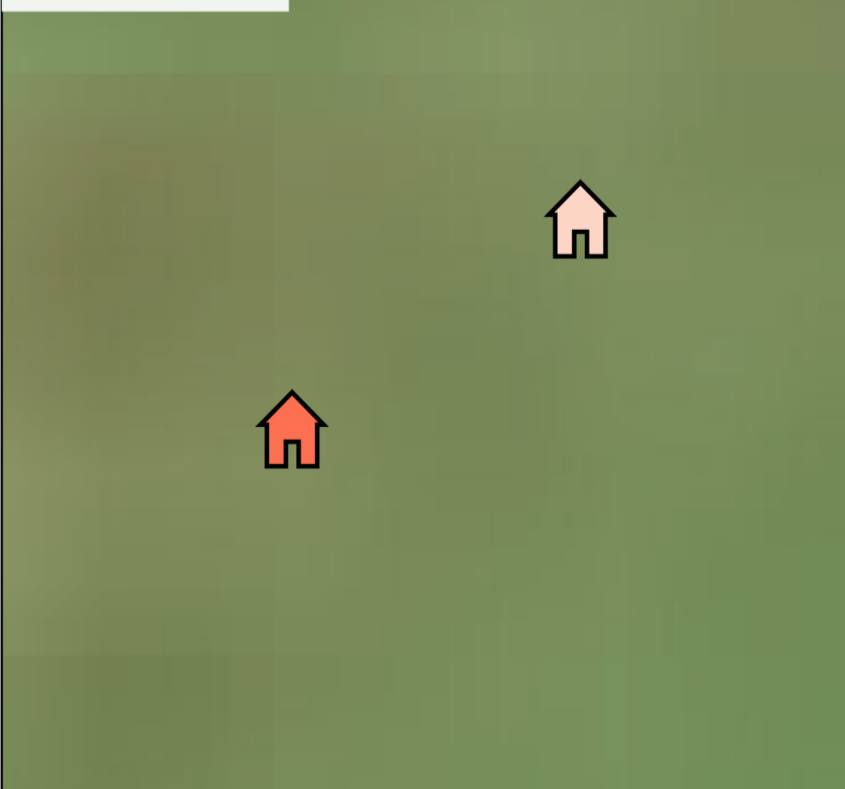

10 0 10 20 30 40 m

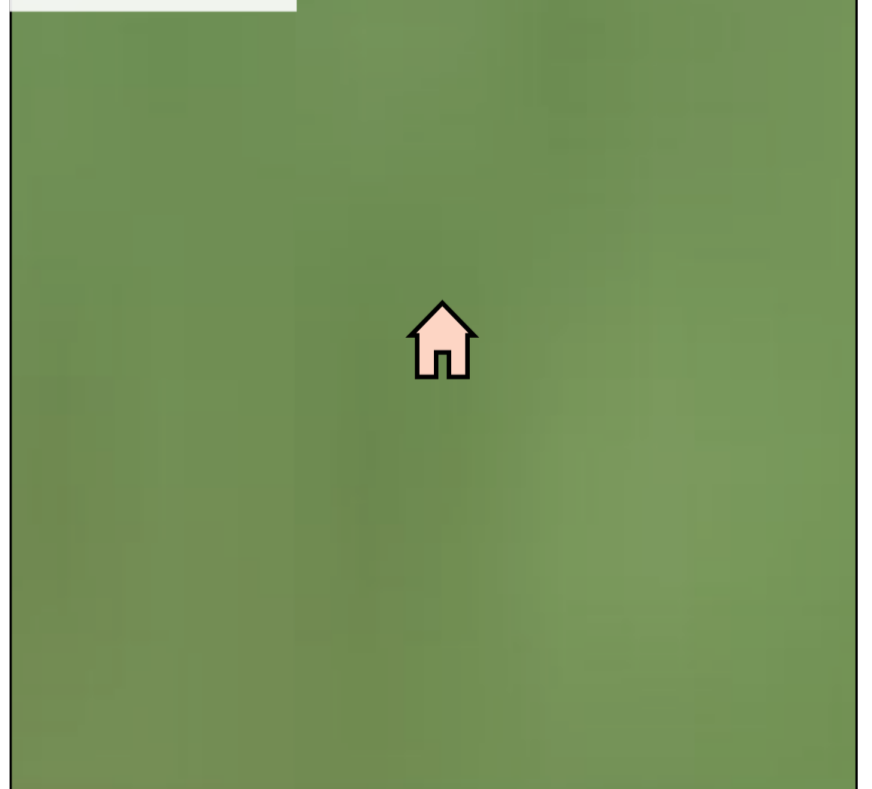

## Malaria Cases

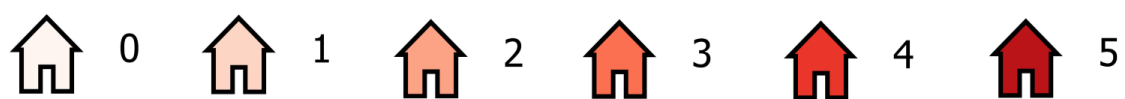

Supplement: MOESM2 [file 10632706]
